# Supplementary material for: Corona formation around monazite and xenotime during greenschist-facies metamorphism and deformation
Source: Copernicus journal article supplement (doi:10.5194/ejm-32-521-2020), 2020-10-15
Supplement: Supplementary file 1 [file ejm-32-521-2020-supplement.zip]

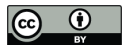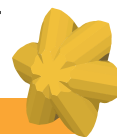

## *Supplement of*

# **Corona formation around monazite and xenotime during greenschist-facies metamorphism and deformation**

**Felix Hentschel et al.**

*Correspondence to:* Felix Hentschel ([felix.hentschel@lmu.de](mailto:felix.hentschel@lmu.de))

- [ejm-32-521-2020-supplement-title-page.pdf](#)
- [CT559x.pdf](#)
- [FH21x.pdf](#)
- [FH27x.pdf](#)
- [FH36x.pdf](#)
- [KD75A.pdf](#)
- [LA-ICP-MS\\_Data.xlsx](#)

The copyright of individual parts of the supplement might differ from the CC BY 4.0 License.
