# Supplementary figures and images for: Corona formation around monazite and xenotime during greenschist-facies metamorphism and deformation
Source: Copernicus journal article supplement (doi:10.5194/ejm-32-521-2020), 2020-10-15

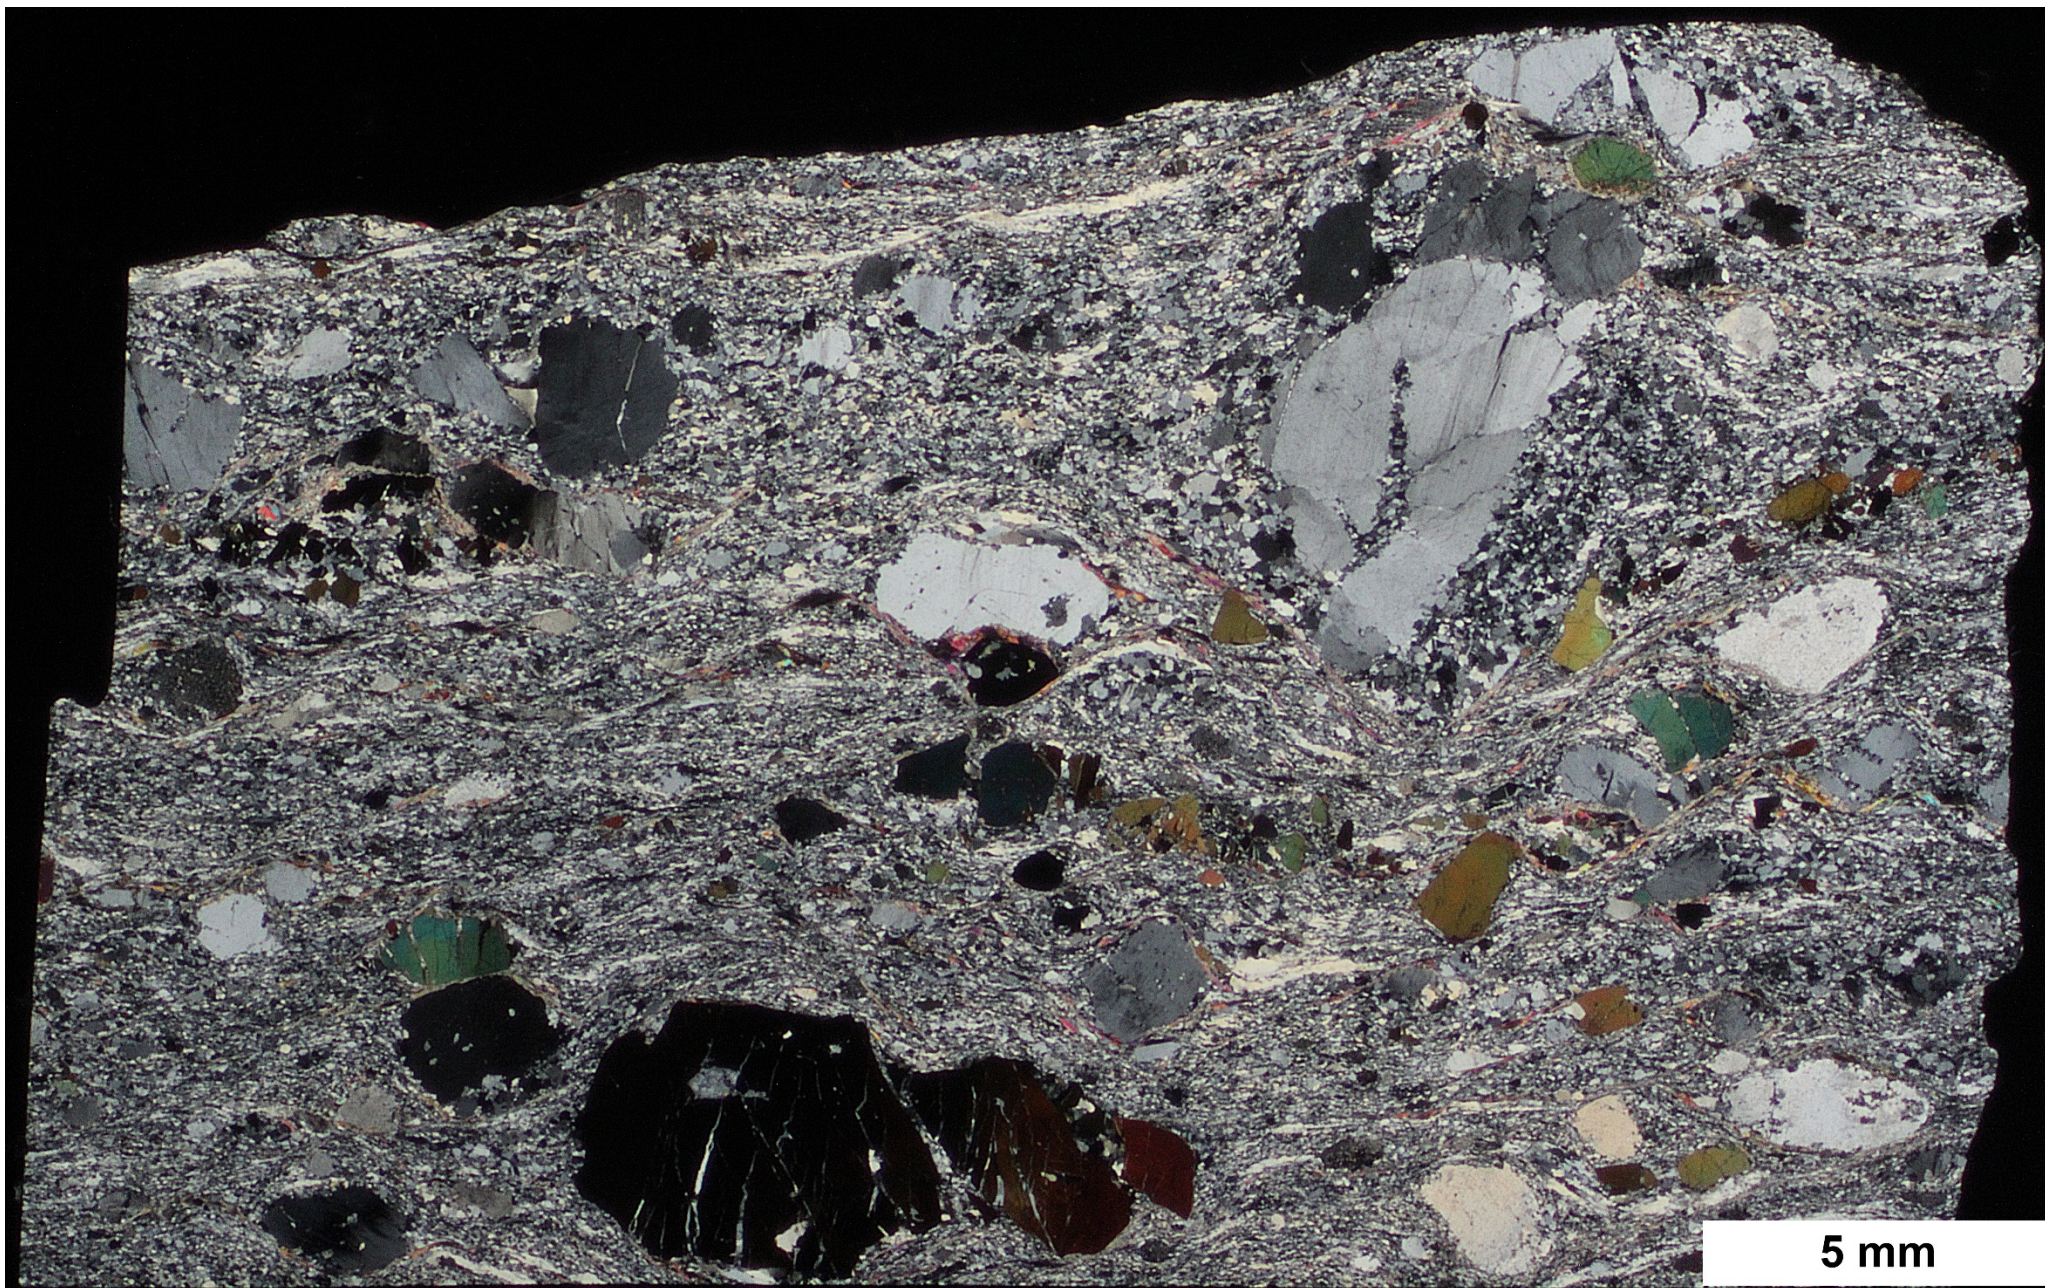

Supplement: Supplementary file 2 [file ejm-32-521-2020-supplement.zip]

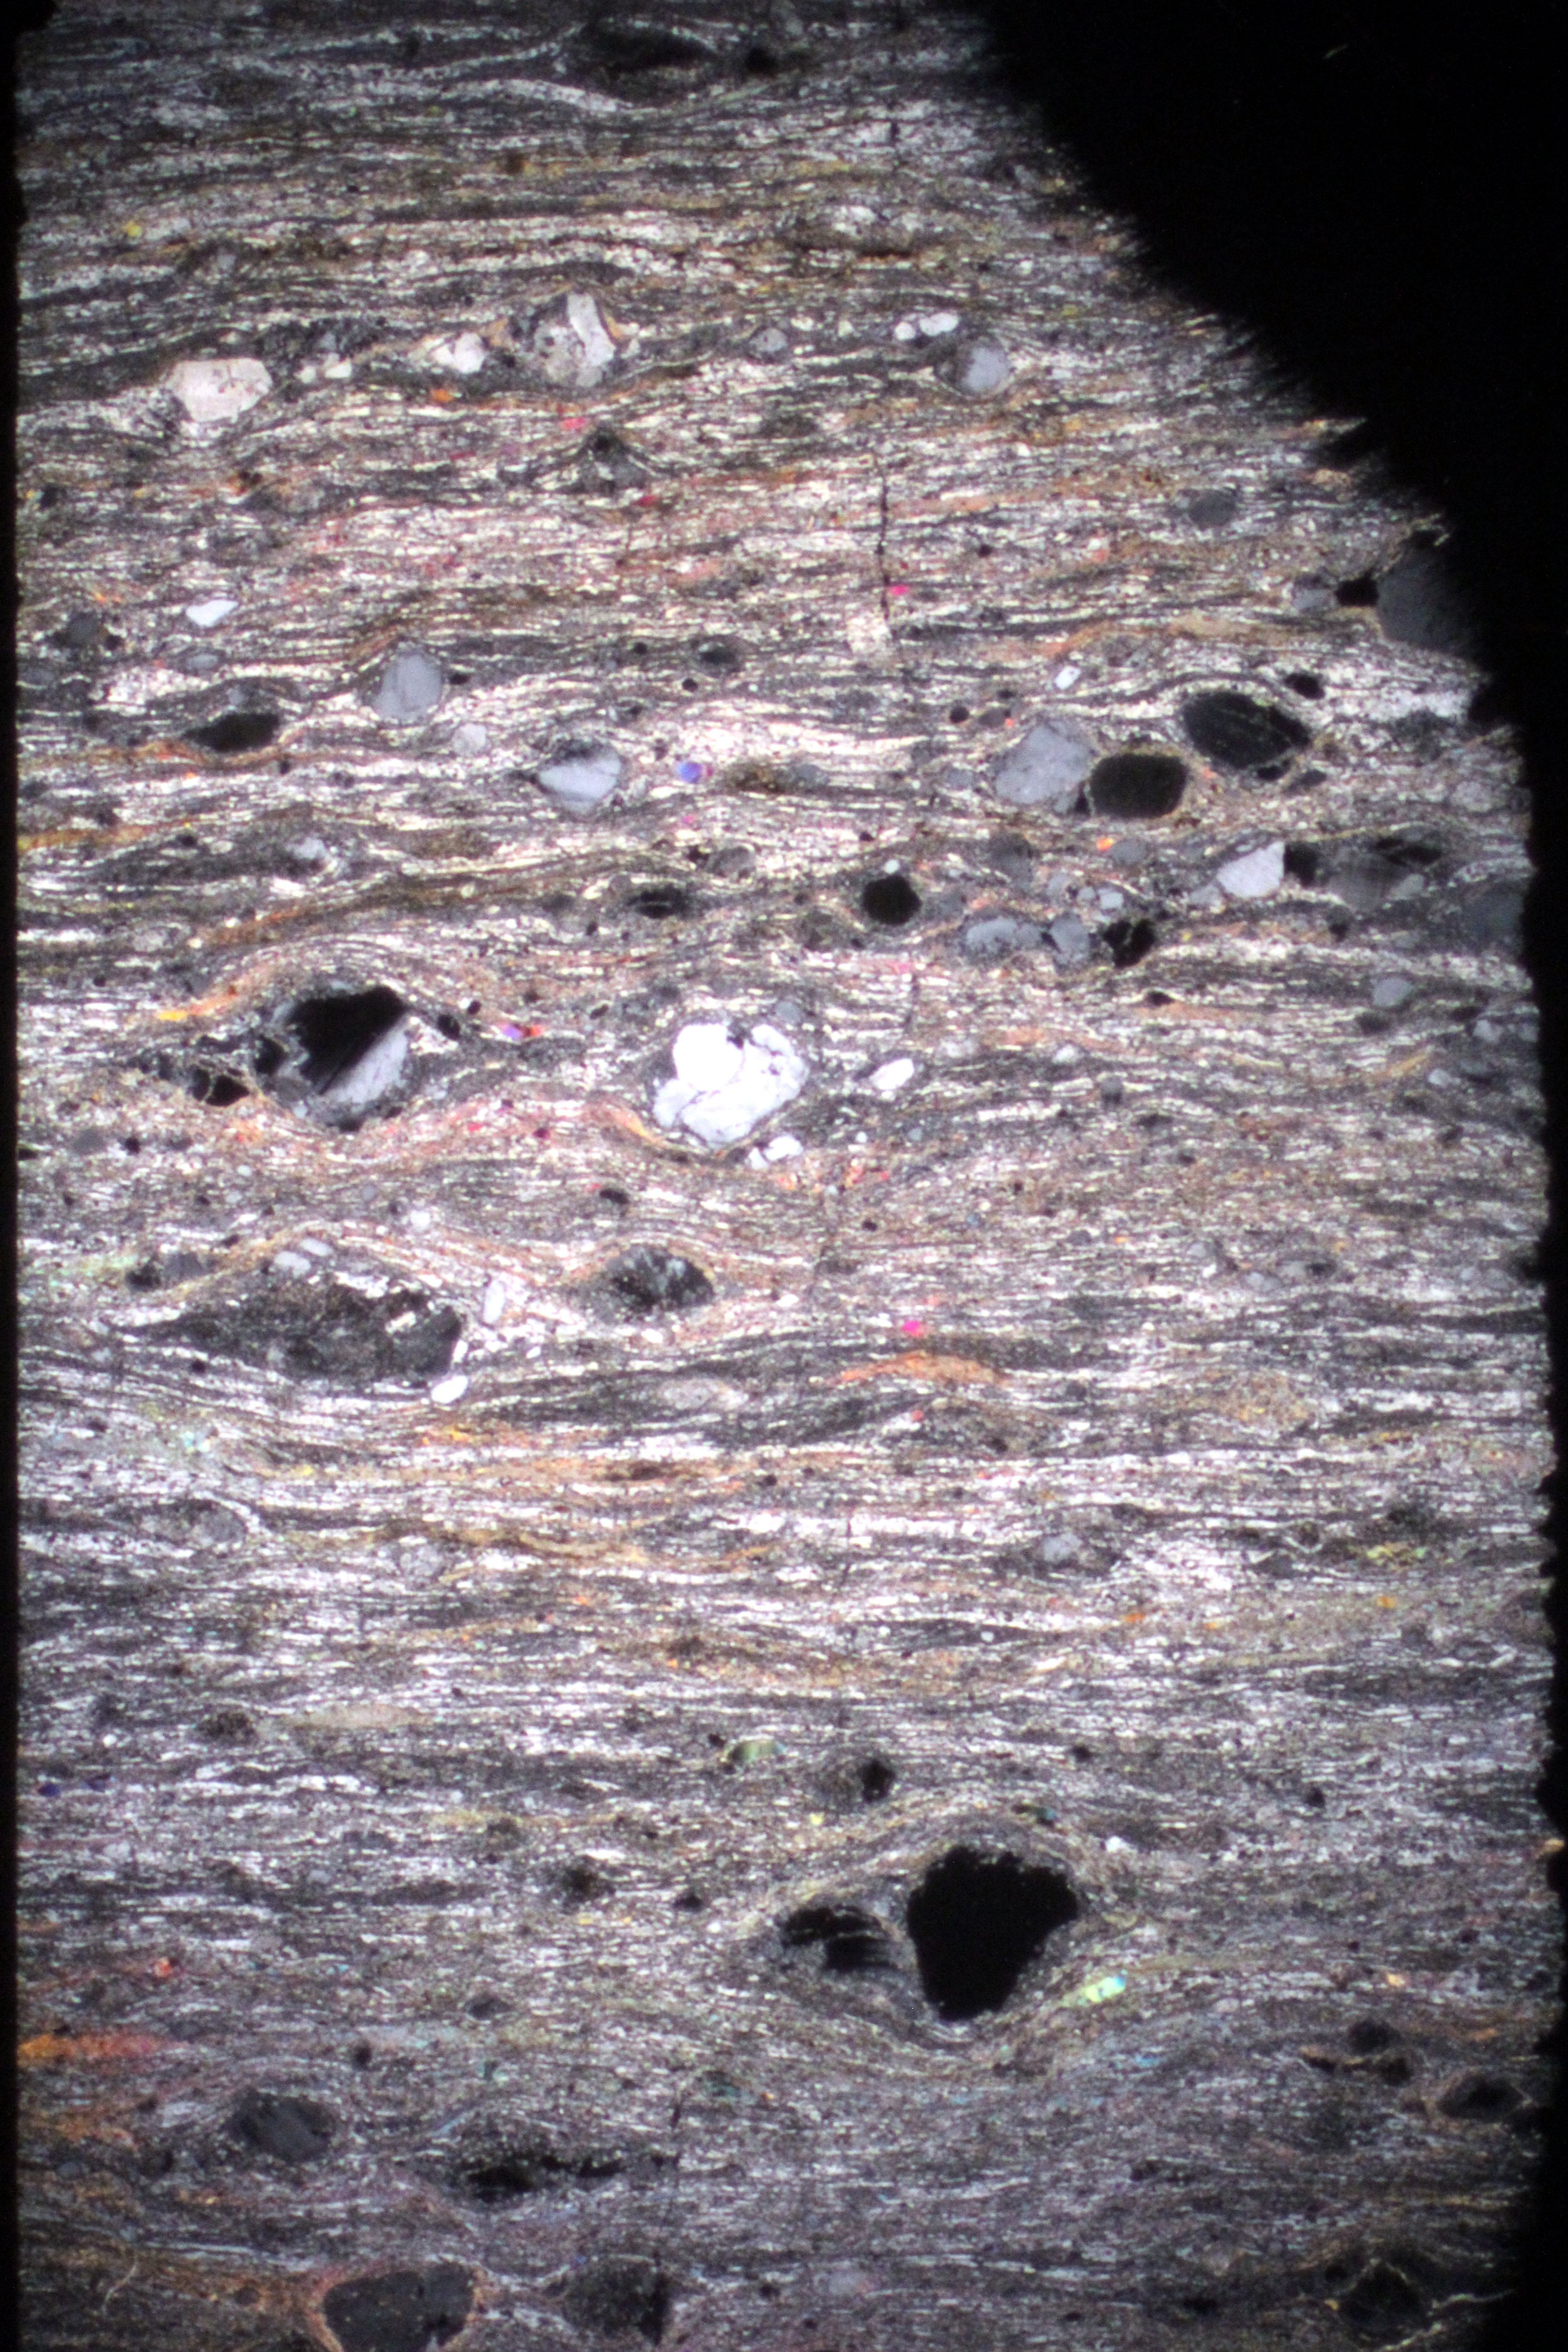

Supplement: Supplementary file 3 [file ejm-32-521-2020-supplement.zip]

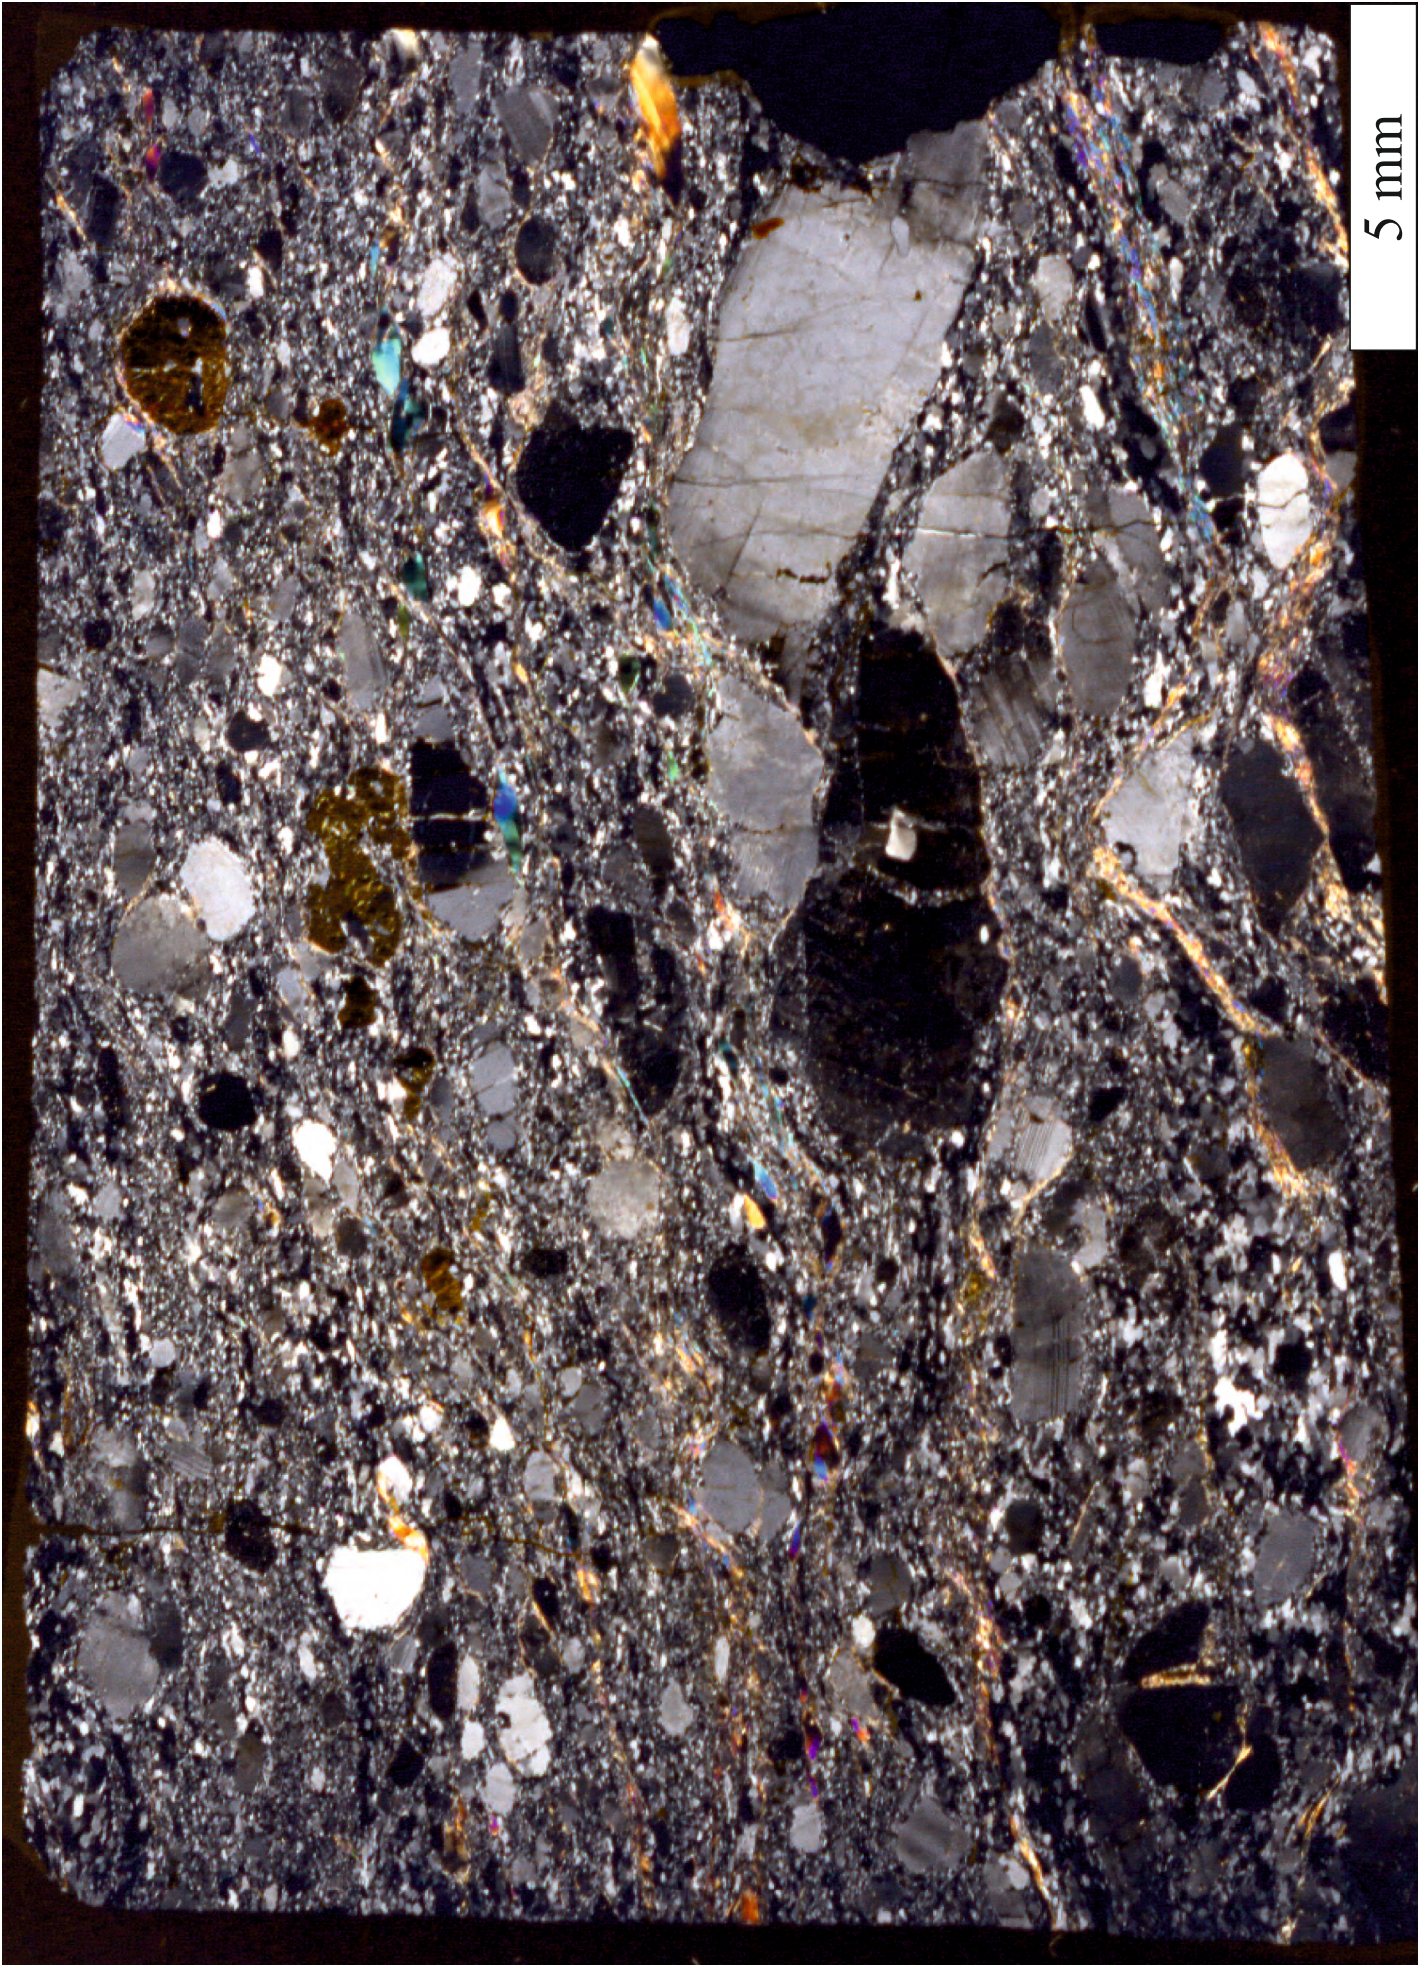

5 mm

Supplement: Supplementary file 4 [file ejm-32-521-2020-supplement.zip]

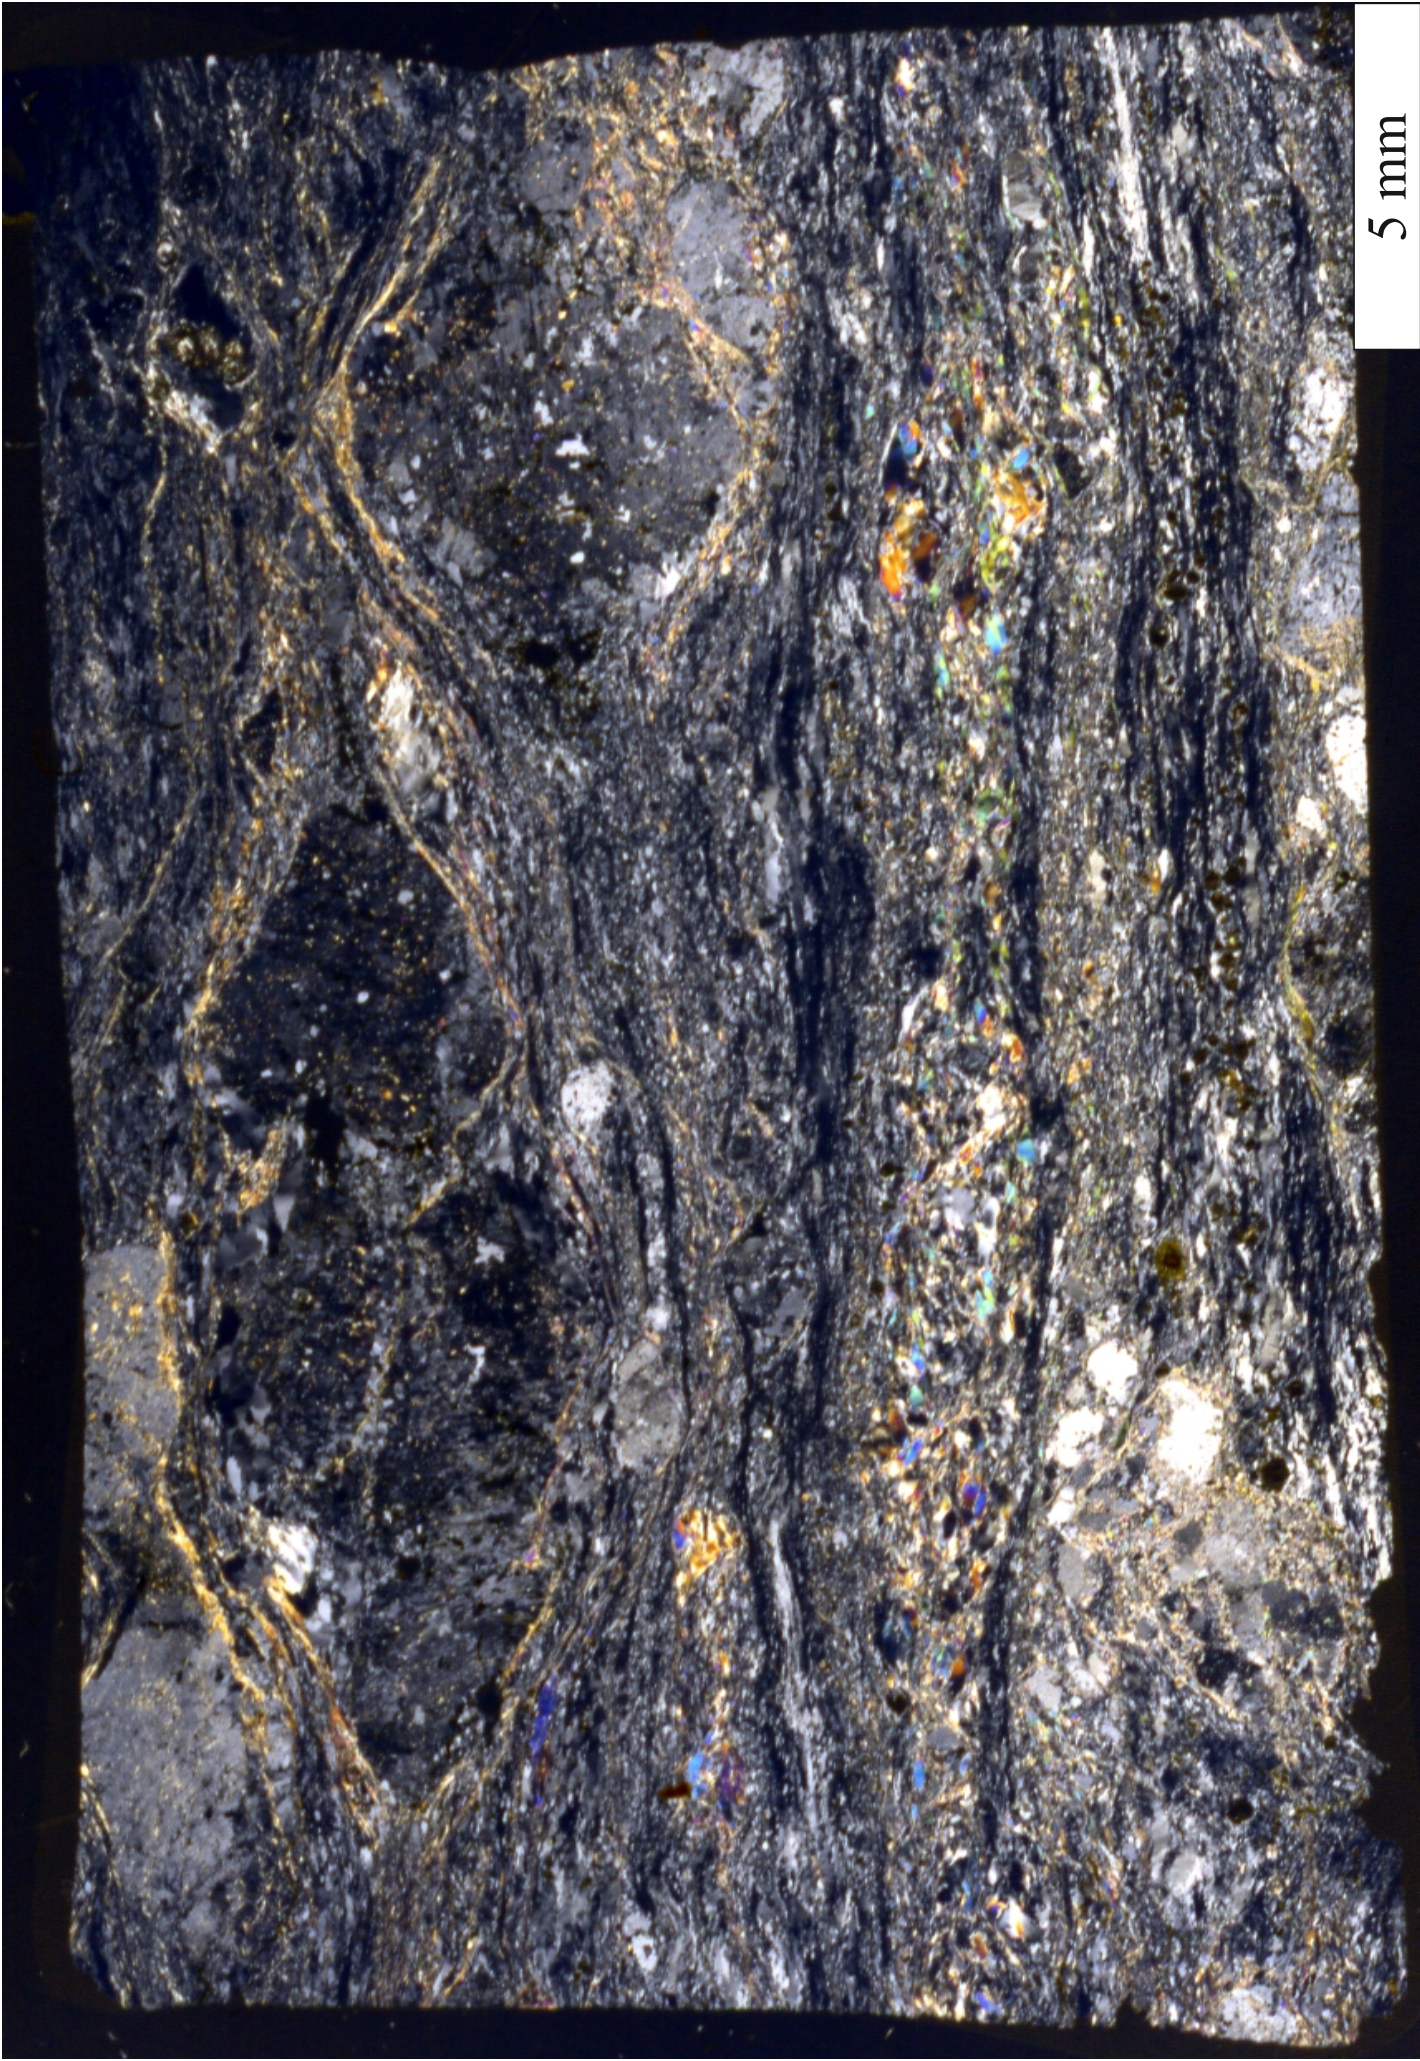

5 mm

Supplement: Supplementary file 5 [file ejm-32-521-2020-supplement.zip]

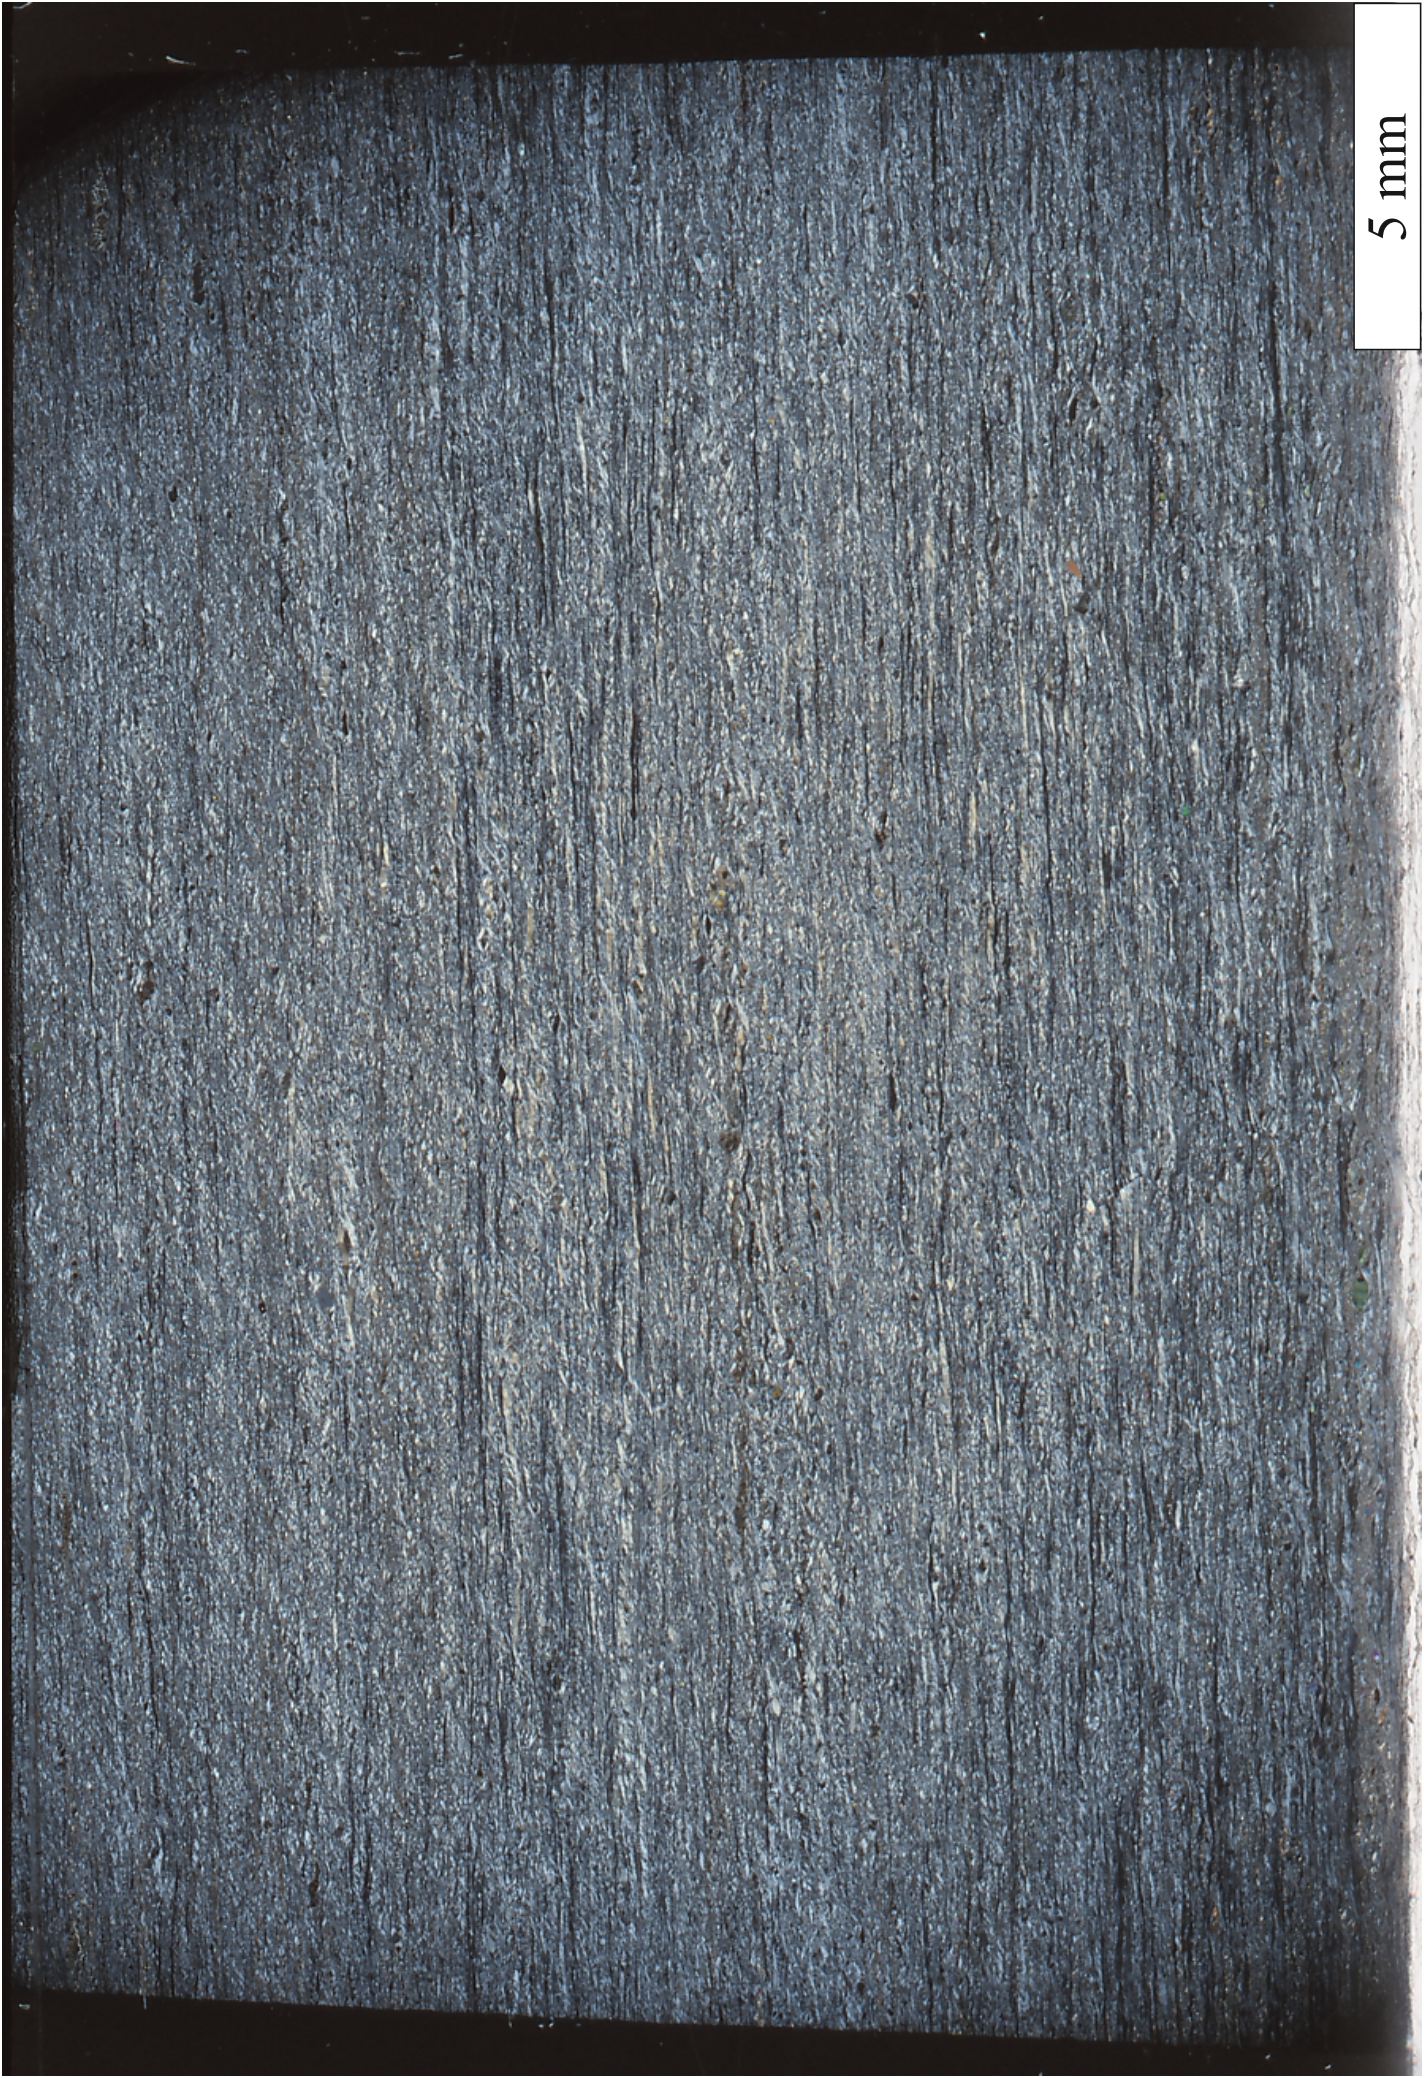

5 mm

Supplement: Supplementary file 6 [file ejm-32-521-2020-supplement.zip]
